# Supplementary material for: Design and Analysis of Sustainable and Seasonal Profit Scaling Model in Cloud Environment
Source: Hindawi journal article supplement (doi:10.1155/2019/7457938), 2019-10-24
Supplement: f1 [file 7457938.f1.xlsx]

## Sheet: GAwdDE
		GA with DE
		Batch 1 Task				Batch 2 Task				Batch 3 Task
Simulation Number	Number of Task	MakeSpan	Cost Of Expanses	Throughput	Number of Task	MakeSpan	Cost Of Expanses	Throughput	Number of Task	MakeSpan	Cost Of Expanses	Throughput
1	200	1910.91	5732.72	914.407	72	1734.09	5202.26	793.985	60	1615.79	4847.37	742.046
2	200	934.023	2802.07	466.911	72	1916.19	5748.56	929.821	60	2152.52	6457.57	1008.42
3	200	1437.61	4312.83	718.706	72	1584.65	4753.96	802.529	60	1783.99	5351.98	806.929
4	200	1629.5	4888.5	779.733	72	1928.88	5786.65	928.948	60	1895.86	5687.57	923.97
5	180	1259.24	3777.73	542.08	72	1832.68	5498.05	815.607	60	1825.57	5476.71	821.619
6	180	1036.04	3108.12	471.782	72	1309.08	3927.25	637.197	60	1557.58	4672.73	737.597
7	200	2335.6	7006.8	1167.7	72	1392.21	4176.64	632.289	60	1775.42	5326.25	761.441
8	180	1244.91	3734.73	622.355	72	1590.08	4770.25	749.354	60	1778.95	5336.86	831.101
9	180	1045.15	3135.44	475.931	72	1782.5	5347.49	825.67	60	1845.72	5537.17	840.172
10	150	1071.03	3213.09	535.416	72	1378.26	4134.77	623.41	60	1144.74	3434.21	536.688

## Sheet: SSSA-MPSA
		SSSA-MPSA
		Batch 1 Task				Batch 2 Task				Batch 3 Task
Simulation Number	Number of Task	MakeSpan	Cost Of Expanses	Throughput	Number of Task	MakeSpan	Cost Of Expanses	Throughput	Number of Task	MakeSpan	Cost Of Expanses	Throughput
1	200	1291.99	3875.97	914.407	72	1303.96	3911.88	295.821	60	1308.96	3926.88	298.218
2	200	1314.98	3944.94	203.087	72	1323.18	3969.54	268.703	60	1336.98	4010.94	258.425
3	200	1034.89	3455.78	344.897	72	1364.22	3623.99	244.671	60	1298.56	3356.98	244.568
4	200	1125.77	3089.66	455.987	72	1254.98	3398.87	234.877	60	1345.34	2012.54	276.453
5	200	1434.67	2045.56	422.079	72	1145.67	3587.23	265.452	60	1199.78	1987.67	311.342
6	180	1519.95	4559.85	290.045	72	1200.97	3602.91	290.354	60	1237.01	3711.03	295.641
7	180	1218.98	3656.94	224.043	72	1255.94	3767.82	240.651	60	1290.98	3872.94	242.028
8	180	1293.97	3881.91	259.154	72	1320.97	3962.91	265.881	60	1220.64	3661.92	298.938
9	180	1399.97	4199.91	239.523	72	1250	3750	246.604	60	1242	3726	252.316
10	150	1350.97	4052.91	242.525	72	1222	3666	245.182	60	1234.98	3704.94	251.281
